# Supplementary material for: A Systematic Literature Review of the Relationship between Serum Ferritin and Outcomes in Myelodysplastic Syndromes
Source: MDPI journal article supplement (doi:10.3390/jcm11030895), 2022-02-08
Supplement: s1 [file s1]

## SUPPLEMENTARY MATERIALS

**Table S1.** MEDLINE (via Ovid) Search Strategy for MDS Population.

| Search Number | Search String                                                                                                                                                                                                                                                                                                           |
|---------------|-------------------------------------------------------------------------------------------------------------------------------------------------------------------------------------------------------------------------------------------------------------------------------------------------------------------------|
| 1.            | exp Myelodysplastic Syndromes/ or myelodysplas*.tw. or mds.tw.                                                                                                                                                                                                                                                          |
| 2.            | exp Iron-Binding Proteins/ or serum ferritin.mp.                                                                                                                                                                                                                                                                        |
| 3.            | 1 and 2                                                                                                                                                                                                                                                                                                                 |
| 4.            | (animals not humans).sh.                                                                                                                                                                                                                                                                                                |
| 5.            | (case report or case series or woman or man or child or adolescent or female or male or boy or girl or infant).ti.                                                                                                                                                                                                      |
| 6.            | case reports/ or case report\$.jw.                                                                                                                                                                                                                                                                                      |
| 7.            | (Ephemera or Introductory Journal Article or News or Newspaper Article or Editorial or Comment or Overall or Letter or Congress).pt. or In Vitro Techniques/ or (commentary or editorial or comment or letter or congress or mice or rat or mouse or animal or murine).ti.                                              |
| 8.            | review.pt. not (systematic or meta\$).mp.                                                                                                                                                                                                                                                                               |
| 9.            | 3 not (4 or 5 or 6 or 7 or 8)                                                                                                                                                                                                                                                                                           |
| 10.           | (pediatric\$ or paediatric\$ or preterm\$ or newborn\$ or child\$ or infant\$ or infancy or neonat\$ or preschool\$ or young\$ or early years or adolescen\$ or teenage\$ or preteen\$ or youth or girl\$ or boy\$ or student\$ or juvenile\$ or minor or minors or baby or babies).ti.                                 |
| 11.           | (pediatric\$ or paediatric\$ or preterm\$ or newborn\$ or child\$ or infant\$ or infancy or neonat\$ or preschool\$ or young\$ or early years or adolescen\$ or teenage\$ or preteen\$ or youth or girl\$ or boy\$ or student\$ or juvenile\$ or minor or minors or baby or babies).ti. and (exp adult/ or adult\$.ti.) |
| 12.           | 10 not 11                                                                                                                                                                                                                                                                                                               |
| 13.           | 9 not 12                                                                                                                                                                                                                                                                                                                |
| 14.           | limit 9 to english language                                                                                                                                                                                                                                                                                             |
| 15.           | limit 10 to yr="2009 -Current"                                                                                                                                                                                                                                                                                          |

Abbreviation: MDS, myelodysplastic syndromes.

**Table S2.** Embase (via Ovid) Search Strategy for MDS Population.

| Search Number | Search String                                                                                                                                                                                                                                                                                                           |
|---------------|-------------------------------------------------------------------------------------------------------------------------------------------------------------------------------------------------------------------------------------------------------------------------------------------------------------------------|
| 1.            | exp Myelodysplastic Syndrome/ or myelodysplas\$.tw. or mds.tw.                                                                                                                                                                                                                                                          |
| 2.            | exp ferritin blood level/ or serum ferritin.mp.                                                                                                                                                                                                                                                                         |
| 3.            | 1 and 2                                                                                                                                                                                                                                                                                                                 |
| 4.            | limit 3 to (article or article in press)                                                                                                                                                                                                                                                                                |
| 5.            | (animal not human).sh.                                                                                                                                                                                                                                                                                                  |
| 6.            | (case report or case series or woman or man or child or adolescent or female or male or boy or girl or infant).ti.                                                                                                                                                                                                      |
| 7.            | case study/ or case report\$.jx. or case report\$.jw.                                                                                                                                                                                                                                                                   |
| 8             | (editorial or note or letter).pt. or in vitro Techniques/ or in vitro study/ or (commentary or editorial or comment or letter or mice or rat or mouse or animal or murine).ti.                                                                                                                                          |
| 9.            | review.pt. not (systematic or meta\$).mp.                                                                                                                                                                                                                                                                               |
| 10.           | 4 not (5 or 6 or 7 or 8 or 9)                                                                                                                                                                                                                                                                                           |
| 11.           | (pediatric\$ or paediatric\$ or preterm\$ or newborn\$ or child\$ or infant\$ or infancy or neonat\$ or preschool\$ or young\$ or early years or adolescen\$ or teenage\$ or preteen\$ or youth or girl\$ or boy\$ or student\$ or juvenile\$ or minor or minors or baby or babies).ti.                                 |
| 12.           | (pediatric\$ or paediatric\$ or preterm\$ or newborn\$ or child\$ or infant\$ or infancy or neonat\$ or preschool\$ or young\$ or early years or adolescen\$ or teenage\$ or preteen\$ or youth or girl\$ or boy\$ or student\$ or juvenile\$ or minor or minors or baby or babies).ti. and (exp adult/ or adult\$.ti.) |
| 13.           | 11 not 12                                                                                                                                                                                                                                                                                                               |
| 14.           | 10 not 13                                                                                                                                                                                                                                                                                                               |
| 15.           | limit 14 to english language                                                                                                                                                                                                                                                                                            |
| 16.           | Limit 11 to yr="2009 -Current"                                                                                                                                                                                                                                                                                          |

Abbreviation: MDS, myelodysplastic syndromes.

**Table S3.** MEDLINE (via Ovid) Search Strategy for MDS Population.

| Author and Year of Publication | Summary Study Participation                                                                                                                                           | Study Attrition Summary                                                                                                                                                                                                                                        | PF Measurement Summary                                                                      | Outcome Measurement Summary                                                                                  | Study Confounding Summary                                                                                                                                      | Statistical Analysis and Presentation Summary                                                                                           |
|--------------------------------|-----------------------------------------------------------------------------------------------------------------------------------------------------------------------|----------------------------------------------------------------------------------------------------------------------------------------------------------------------------------------------------------------------------------------------------------------|---------------------------------------------------------------------------------------------|--------------------------------------------------------------------------------------------------------------|----------------------------------------------------------------------------------------------------------------------------------------------------------------|-----------------------------------------------------------------------------------------------------------------------------------------|
|                                | The study sample represents the population of interest on key characteristics, sufficient to limit potential bias of the observed relationship between PF and outcome | Loss to follow-up (from baseline sample to study population analyzed) is not associated with key characteristics (i.e., the study data adequately represent the sample) sufficient to limit potential bias to the observed relationship between PF and outcome | <i>PF</i> is adequately measured in study participants to sufficiently limit potential bias | <i>Outcome of interest</i> is adequately measured in study participants to sufficiently limit potential bias | Important potential confounders are appropriately accounted for, limiting potential bias with respect to the relationship between <i>PF</i> and <i>outcome</i> | The statistical analysis is appropriate for the design of the study, limiting potential for presentation of invalid or spurious results |
| Irwin, 2011 [20]               | Low Risk                                                                                                                                                              | Low Risk                                                                                                                                                                                                                                                       | Low Risk                                                                                    | Low Risk                                                                                                     | Low Risk                                                                                                                                                       | Low Risk                                                                                                                                |
| Park, 2011 [28]                | Low Risk                                                                                                                                                              | Low Risk                                                                                                                                                                                                                                                       | Low Risk                                                                                    | Low Risk                                                                                                     | Low Risk                                                                                                                                                       | Low Risk                                                                                                                                |

|                               |               |          |          |          |               |          |
|-------------------------------|---------------|----------|----------|----------|---------------|----------|
| Waszczuk-Gajda, 2016 [34]     | Moderate Risk | Low Risk | Low Risk | Low Risk | Low Risk      | Low Risk |
| Cakar, 2013 [15]              | Moderate Risk | Low Risk | Low Risk | Low Risk | Low Risk      | Low Risk |
| Cermak, 2009 [16]             | Moderate Risk | Low Risk | Low Risk | Low Risk | Low Risk      | Low Risk |
| Cremers, 2019 [17]            | Low Risk      | Low Risk | Low Risk | Low Risk | Low Risk      | Low Risk |
| Diamantopoulos, 2019 [18]     | Low Risk      | Low Risk | Low Risk | Low Risk | Low Risk      | Low Risk |
| Escudero-Vilaplana, 2015 [19] | Low Risk      | Low Risk | Low Risk | Low Risk | Moderate Risk | Low Risk |
| Kadlcikova, 2017 [21]         | Moderate Risk | Low Risk | Low Risk | Low Risk | Moderate Risk | Low Risk |
| Kawabata, 2019 [22]           | Low Risk      | Low Risk | Low Risk | Low Risk | Low Risk      | Low Risk |
| Kikuchi, 2012 [23]            | Low Risk      | Low Risk | Low Risk | Low Risk | Low Risk      | Low Risk |
| Li, 2013 [24]                 | Low Risk      | Low Risk | Low Risk | Low Risk | Low Risk      | Low Risk |
| Lucijanic, 2016 [25]          | Moderate Risk | Low Risk | Low Risk | Low Risk | Low Risk      | Low Risk |
| Oran, 2014 [26]               | Low Risk      | Low Risk | Low Risk | Low Risk | Low Risk      | Low Risk |
| Patnaik, 2010 [29]            | Low Risk      | Low Risk | Low Risk | Low Risk | Low Risk      | Low Risk |
| Prem, 2020 [30]               | Low Risk      | Low Risk | Low Risk | Low Risk | Moderate Risk | Low Risk |
| Risum, 2016 [31]              | Low Risk      | Low Risk | Low Risk | Low Risk | Low Risk      | Low Risk |
| Senturk-Yikilmaz, 2019 [32]   | Low Risk      | Low Risk | Low Risk | Low Risk | Low Risk      | Low Risk |

|                  |          |          |          |          |          |          |
|------------------|----------|----------|----------|----------|----------|----------|
| Sperr, 2010 [33] | Low Risk |
| Wong, 2018 [35]  | Low Risk |

Abbreviation: PF, prognostic factor.

**Table S4.** SF and Survival Outcomes in MDS Studies.

| Study Author, Year<br>Country<br>Study Design               | Population (n)                                | Univariate or<br>Multivariate and<br>Type of Statistical<br>Analysis<br>Performed | Model Variables | Time Point at<br>Which SF<br>Evaluated | Continuous or<br>Categorical,<br>and Categories | Outcome              | Effect                 |
|-------------------------------------------------------------|-----------------------------------------------|-----------------------------------------------------------------------------------|-----------------|----------------------------------------|-------------------------------------------------|----------------------|------------------------|
| Park, 2011 [28]<br>France<br>Retrospective cohort           | Overall<br>318                                | Univariate<br>Wilcoxon's test                                                     | NR              | Diagnosis<br>(Baseline)                | Categorical<br>SF >300 ng/mL<br>(n = 153)       | OS                   | p = 0.98               |
|                                                             | Overall<br>318                                | Univariate<br>Wilcoxon's test                                                     | NR              | Diagnosis<br>(Baseline)                | Categorical<br>SF >1000<br>ng/mL (n = 32)       | OS                   | p = 0.67               |
| Waszczuk-Gajda, 2016 [34]<br>Poland<br>Retrospective cohort | Overall<br>190                                | Univariate<br>Cox proportional<br>hazards                                         | NR              | Diagnosis<br>(Baseline)                | Categorical<br>SF >1000<br>ng/mL (n = 20)       | Worsened<br>survival | HR: 2.94<br>p = 0.0023 |
| Cermak, 2009 [16]<br>Czech Republic<br>Retrospective cohort | Overall<br>137                                | Univariate<br>Log rank test                                                       | NR              | Most recent<br>available               | Categorical<br>SF >2000 µg/L<br>(n = 69)        | OS                   | p = 0.135              |
|                                                             | Subgroup:<br>Non-<br>transplanted<br>patients | Univariate<br>Log rank test                                                       | NR              | Most recent<br>available               | Categorical<br>SF >2000 µg/L<br>(n = 69)        | OS                   | p = 0.049              |

| Study Author, Year<br>Country<br>Study Design                      | Population (n) | Univariate or<br>Multivariate and<br>Type of Statistical<br>Analysis<br>Performed | Model Variables                                                                                                                                                                                                | Time Point at<br>Which SF<br>Evaluated | Continuous or<br>Categorical,<br>and Categories | Outcome | Effect                                       |
|--------------------------------------------------------------------|----------------|-----------------------------------------------------------------------------------|----------------------------------------------------------------------------------------------------------------------------------------------------------------------------------------------------------------|----------------------------------------|-------------------------------------------------|---------|----------------------------------------------|
|                                                                    | 107            |                                                                                   |                                                                                                                                                                                                                |                                        |                                                 |         |                                              |
|                                                                    | Overall<br>137 | Multivariate<br>Cox regression<br>analysis                                        | WHO classification, IPSS<br>subgroup, age, SF levels,<br>progressive disease, RBC<br>units/month                                                                                                               | Most recent<br>available               | Categorical<br>SF >2000 µg/L<br>(n = 69)        | OS      | p = 0.007                                    |
| Cremers, 2019 [17]<br>European multi-country<br>Prospective cohort | Overall<br>222 | Multivariate<br>Cox proportional<br>hazards                                       | RBC transfusions, CRP levels,<br>SF levels (continuous in units of<br>1000 ng/mL) and comorbidities,<br>WHO classification, age at<br>HSCT, donor type, sex-match,<br>and intensity of conditioning<br>regimen | Baseline                               | Continuous<br>(units of 1000<br>ng/mL)          | OS      | HR (95%<br>CI): 1.2<br>(1–1.4);<br>p = 0.05  |
|                                                                    | Overall<br>222 | Multivariate<br>Cox proportional<br>hazards                                       | RBC transfusions, CRP levels,<br>SF levels (continuous in units of<br>1000 ng/mL) and comorbidities,<br>WHO classification, age at<br>HSCT, donor type, sex-match,                                             | Baseline                               | Continuous<br>(units of 1000<br>ng/mL)          | NRM     | HR (95%<br>CI): 1.1<br>(0.8–1.4);<br>p = 0.6 |

| Study Author, Year<br>Country<br>Study Design                         | Population (n)                                    | Univariate or<br>Multivariate and<br>Type of Statistical<br>Analysis<br>Performed | Model Variables                                                                                  | Time Point at<br>Which SF<br>Evaluated | Continuous or<br>Categorical,<br>and Categories        | Outcome | Effect                                                  |
|-----------------------------------------------------------------------|---------------------------------------------------|-----------------------------------------------------------------------------------|--------------------------------------------------------------------------------------------------|----------------------------------------|--------------------------------------------------------|---------|---------------------------------------------------------|
|                                                                       |                                                   |                                                                                   | and intensity of conditioning<br>regimen                                                         |                                        |                                                        |         |                                                         |
| Diamantopoulos, 2019 [18]<br><br>Greece<br><br>Retrospective cohort   | Overall<br><br>88                                 | Univariate<br><br>Log rank test                                                   | NR                                                                                               | Diagnosis<br><br>(Baseline)            | Categorical<br><br>SF >400 ng/mL<br><br>(n = NR)       | OS      | $p = 0.003$                                             |
|                                                                       | Overall<br><br>88                                 | Multivariate<br><br>NR                                                            | CMML-1/2, Hb <10 g/dL, SF<br>>400 ng/mL, PLT <100 x 10 <sup>9</sup> /L<br>and circulating blasts | Diagnosis<br><br>(Baseline)            | Categorical<br><br>SF >400 ng/mL<br><br>(n = NR)       | OS      | HR (95%<br>CI): 2.84<br>(1.16–<br>6.94);<br>$p = 0.022$ |
| Kadlcikova, 2017 [21]<br><br>Czech Republic<br><br>Prospective cohort | Overall<br><br>73                                 | Multivariate<br><br>Cox proportional<br>hazards                                   | NR                                                                                               | Diagnosis<br><br>(Baseline)            | Continuous                                             | OS      | HR: 1.2<br>$p < 0.001$                                  |
| Kawabata, 2019 [22]<br><br>Japan<br><br>Prospective cohort            | Overall<br><br>107<br><br>Low SF group:<br><br>56 | Multivariate<br><br>Cox proportional<br>hazards                                   | Age, sex, Hb level, neutrophil<br>count, platelet count, BM blast<br>percentage, and cytogenetic | Diagnosis<br><br>(Baseline)            | Categorical<br><br>SF $\geq 210$ ng/mL<br><br>(n = 51) | OS      | HR (95%<br>CI): 2.14<br>(1.02–<br>4.50);                |



| Study Author, Year<br>Country<br>Study Design               | Population (n)                                                       | Univariate or<br>Multivariate and<br>Type of Statistical<br>Analysis<br>Performed | Model Variables                                                                                                         | Time Point at<br>Which SF<br>Evaluated | Continuous or<br>Categorical,<br>and Categories                   | Outcome | Effect                                                            |
|-------------------------------------------------------------|----------------------------------------------------------------------|-----------------------------------------------------------------------------------|-------------------------------------------------------------------------------------------------------------------------|----------------------------------------|-------------------------------------------------------------------|---------|-------------------------------------------------------------------|
|                                                             | High SF group:<br>51                                                 |                                                                                   | score (based on the IPSS-R) in<br>addition to SF level                                                                  |                                        |                                                                   |         | $p = 0.044$                                                       |
| Kikuchi, 2012 [23]<br><br>Japan<br><br>Retrospective cohort | Overall<br>47<br><br>Low SF group:<br>37<br><br>High SF group:<br>10 | Univariate<br><br>Logistic regression                                             | NA; univariate                                                                                                          | Diagnosis<br><br>(Baseline)            | Categorical<br><br>SF $\geq 500$ ng/mL<br><br>( $n = 10$ )        | OS      | HR (95%<br>CI): 10.7<br><br>(2.375–<br>48.23);<br><br>$p = 0.002$ |
|                                                             | Overall<br>47<br><br>Low SF group:<br>37<br><br>High SF group:<br>10 | Multivariate<br><br>Cox proportional<br>hazards                                   | Cytogenetic risk (intermediate<br>and poor), IPSS subgroup (Int-2<br>and High), and SF at diagnosis<br>$\geq 500$ ng/mL | Diagnosis<br><br>(Baseline)            | Categorical<br><br>SF $\geq 500$ ng/mL<br><br>( $n = 10$ )        | OS      | HR (95%<br>CI): 1.9<br><br>(1.033–<br>3.497);<br><br>$p = 0.039$  |
|                                                             | Overall<br>47<br><br>Low SF group:                                   | Multivariate<br><br>Cox proportional<br>hazards                                   | NR                                                                                                                      | Diagnosis<br><br>(Baseline)            | Categorical<br><br>SF $\geq 300$ ng/mL<br><br>( $n = \text{NR}$ ) | OS      | HR (95%<br>CI): 3.437                                             |

| Study Author, Year<br>Country<br>Study Design | Population (n)                                               | Univariate or<br>Multivariate and<br>Type of Statistical<br>Analysis<br>Performed | Model Variables                                                           | Time Point at<br>Which SF<br>Evaluated | Continuous or<br>Categorical,<br>and Categories                      | Outcome | Effect                                                     |
|-----------------------------------------------|--------------------------------------------------------------|-----------------------------------------------------------------------------------|---------------------------------------------------------------------------|----------------------------------------|----------------------------------------------------------------------|---------|------------------------------------------------------------|
|                                               | 37<br>High SF group:<br>10                                   |                                                                                   |                                                                           |                                        |                                                                      |         | (1.140–<br>10.36);<br>$p = 0.028$                          |
| Li, 2013 [24]<br>China<br>Prospective cohort  | Overall<br>191                                               | Univariate<br><br>Log rank test                                                   | NA; univariate                                                            | Baseline                               | Categorical<br><br>SF $\geq 500$ $\mu\text{g/L}$<br><br>( $n = 74$ ) | OS      | $p < 0.001$                                                |
|                                               | Overall<br>191                                               | Multivariate<br><br>Cox proportional<br>hazards                                   | ECOG PS score, ANC, SF,<br>percentage of BM blasts, and<br>poor karyotype | Baseline                               | Categorical<br><br>SF $\geq 500$ $\mu\text{g/L}$<br><br>( $n = 74$ ) | OS      | RR (95%<br>CI): 3.53<br>(1.9–6.6);<br>$p < 0.001$          |
|                                               | Subgroup:<br>Patients with<br>prior RBC<br>transfusion<br>83 | Multivariate<br><br>Cox proportional<br>hazards                                   | ECOG PS score, ANC, SF,<br>percentage of BM blasts, and<br>poor karyotype | Baseline                               | Categorical<br><br>SF $\geq 500$ $\mu\text{g/L}$<br><br>( $n = 74$ ) | OS      | RR (95%<br>CI): 2.876<br>(1.612–<br>5.131);<br>$p < 0.001$ |

| Study Author, Year<br>Country<br>Study Design | Population (n)                                                      | Univariate or<br>Multivariate and<br>Type of Statistical<br>Analysis<br>Performed | Model Variables                                                           | Time Point at<br>Which SF<br>Evaluated                                  | Continuous or<br>Categorical,<br>and Categories          | Outcome | Effect                                                   |
|-----------------------------------------------|---------------------------------------------------------------------|-----------------------------------------------------------------------------------|---------------------------------------------------------------------------|-------------------------------------------------------------------------|----------------------------------------------------------|---------|----------------------------------------------------------|
|                                               | Subgroup:<br>Patients<br>without prior<br>RBC<br>transfusion<br>108 | Multivariate<br>Cox proportional<br>hazards                                       | ECOG PS score, ANC, SF,<br>percentage of BM blasts, and<br>poor karyotype | Baseline                                                                | Categorical<br>SF $\geq 500$ $\mu\text{g/L}$<br>(n = 74) | OS      | RR (95%<br>CI): 3.363<br>(1.509–<br>7.495);<br>p = 0.003 |
| Oran, 2014 [26]<br>US<br>Retrospective cohort | Overall<br>256                                                      | Univariate<br>Log rank test                                                       | NR                                                                        | All outcomes were<br>measured from the<br>time of stem cell<br>infusion | Categorical<br>SF >1130 $\mu\text{g/L}$<br>(n = NR)      | TRM     | HR: 2.0<br>p = 0.009                                     |
|                                               | Overall<br>256                                                      | Univariate<br>Log rank test                                                       | NR                                                                        | All outcomes were<br>measured from the<br>time of stem cell<br>infusion | Categorical<br>SF >1130 $\mu\text{g/L}$<br>(n = NR)      | OS      | HR: 2.0<br>p = 0.001                                     |
|                                               | Overall<br>256                                                      | Univariate<br>Log rank test                                                       | NR                                                                        | All outcomes were<br>measured from the                                  | Categorical                                              | TRM     | HR: 1.2<br>p = 0.6                                       |

| Study Author, Year<br>Country<br>Study Design | Population (n) | Univariate or<br>Multivariate and<br>Type of Statistical<br>Analysis<br>Performed | Model Variables                                                                                                      | Time Point at<br>Which SF<br>Evaluated                                  | Continuous or<br>Categorical,<br>and Categories                                               | Outcome | Effect                     |
|-----------------------------------------------|----------------|-----------------------------------------------------------------------------------|----------------------------------------------------------------------------------------------------------------------|-------------------------------------------------------------------------|-----------------------------------------------------------------------------------------------|---------|----------------------------|
|                                               |                |                                                                                   |                                                                                                                      | time of stem cell<br>infusion                                           | SF missing<br><i>versus</i> $\leq 1130$<br>$\mu\text{g/L}$ ( $n = \text{NR}$ )                |         |                            |
|                                               | Overall<br>256 | Univariate<br>Log rank test                                                       | NR                                                                                                                   | All outcomes were<br>measured from the<br>time of stem cell<br>infusion | Categorical<br>SF missing<br><i>versus</i> $\leq 1130$<br>$\mu\text{g/L}$ ( $n = \text{NR}$ ) | OS      | HR: 1.7<br><br>$p = 0.02$  |
|                                               | Overall<br>256 | Multivariate<br>Cox proportional<br>hazards or Fine<br>and Gray method            | Age, SF level at HSCT, donor<br>type, conditioning intensity, and<br>transplantation year                            | All outcomes were<br>measured from the<br>time of stem cell<br>infusion | Categorical<br>SF $> 1150 \mu\text{g/L}$<br>( $n = \text{NR}$ )                               | TRM     | HR: 1.7<br><br>$p = 0.06$  |
|                                               | Overall<br>256 | Multivariate<br>Cox proportional<br>hazards or Fine<br>and Gray method            | Age, histological subtype, T-<br>MDS, MK, SF, and BM blast<br>count at HSCT, donor type, and<br>transplantation year | All outcomes were<br>measured from the<br>time of stem cell<br>infusion | Categorical<br>SF $> 1150 \mu\text{g/L}$<br>( $n = \text{NR}$ )                               | OS      | HR: 2.2<br><br>$p < 0.001$ |

| Study Author, Year<br>Country<br>Study Design             | Population (n)     | Univariate or<br>Multivariate and<br>Type of Statistical<br>Analysis<br>Performed | Model Variables                                                                                                      | Time Point at<br>Which SF<br>Evaluated                                                                                    | Continuous or<br>Categorical,<br>and Categories                                                            | Outcome | Effect                                                                   |
|-----------------------------------------------------------|--------------------|-----------------------------------------------------------------------------------|----------------------------------------------------------------------------------------------------------------------|---------------------------------------------------------------------------------------------------------------------------|------------------------------------------------------------------------------------------------------------|---------|--------------------------------------------------------------------------|
|                                                           | Overall<br>256     | Multivariate<br>Cox proportional<br>hazards or Fine<br>and Gray method            | Age, SF level at HSCT, donor<br>type, conditioning intensity, and<br>transplantation year                            | All outcomes were<br>measured from the<br>time of stem cell<br>infusion                                                   | Categorical<br>SF missing<br><i>versus</i> $\leq 1150$<br>$\mu\text{g/L}$ ( $n = \text{NR}$ )              | TRM     | HR: 0.7<br><br>$p = 0.4$                                                 |
|                                                           | Overall<br>256     | Multivariate<br>Cox proportional<br>hazards or Fine<br>and Gray method            | Age, histological subtype, T-<br>MDS, MK, SF, and BM blast<br>count at HSCT, donor type, and<br>transplantation year | All outcomes were<br>measured from the<br>time of stem cell<br>infusion                                                   | Categorical<br>SF missing<br><i>versus</i> $\leq 1150$<br>$\mu\text{g/L}$ ( $n = \text{NR}$ )              | OS      | HR: 1.1<br><br>$p = 0.2$                                                 |
| Patnaik, 2010 [29]<br><br>USA<br><br>Retrospective cohort | Overall<br><br>88  | Univariate<br><br>Chi-squared test                                                | NR                                                                                                                   | Diagnosis<br><br>(Baseline)                                                                                               | Continuous                                                                                                 | OS      | $p = 0.21$                                                               |
| Prem, 2020 [30]<br><br>Canada<br><br>Retrospective cohort | Overall<br><br>125 | Univariate<br><br>Log rank test                                                   | NR                                                                                                                   | Pretransplant SF<br><br>levels were<br><br>assessed within 30<br><br>days prior to<br><br>admission for<br><br>transplant | Categorical<br><br>SF $\leq 1000$ ( $n =$<br><br>57) <i>versus</i><br><br>$>1000$ ng/mL ( $n$<br><br>= 63) | OS      | HR (95%<br><br>CI): 1.85<br><br>(1.17–<br><br>2.94);<br><br>$p = 0.0086$ |

| Study Author, Year<br>Country<br>Study Design                 | Population (n)                               | Univariate or<br>Multivariate and<br>Type of Statistical<br>Analysis<br>Performed | Model Variables                                                                                     | Time Point at<br>Which SF<br>Evaluated                                                                | Continuous or<br>Categorical,<br>and Categories                                        | Outcome | Effect                                                      |
|---------------------------------------------------------------|----------------------------------------------|-----------------------------------------------------------------------------------|-----------------------------------------------------------------------------------------------------|-------------------------------------------------------------------------------------------------------|----------------------------------------------------------------------------------------|---------|-------------------------------------------------------------|
|                                                               | Overall<br>125                               | Multivariate<br>Cox proportional<br>hazards                                       | NR                                                                                                  | Pretransplant SF<br>levels were<br>assessed within 30<br>days prior to<br>admission for<br>transplant | Categorical<br>SF $\leq 1000$ ( $n = 57$ ) <i>versus</i><br>$>1000$ ng/mL ( $n = 63$ ) | OS      | HR (95%<br>CI): 1.729<br>(1.085–<br>2.754);<br>$p = 0.0212$ |
| Senturk-Yikilmaz, 2019 [32]<br>Turkey<br>Retrospective cohort | Overall<br>62                                | Univariate<br>Cox proportional<br>hazards                                         | NR                                                                                                  | Diagnosis<br>(Baseline)                                                                               | Categorical<br>SF $\geq 400$ ng/mL<br>( $n = 29$ )                                     | OS      | $p = 0.001$                                                 |
| Sperr, 2010 [33]<br>Austria<br>Retrospective cohort           | Overall<br>419                               | Multivariate<br>Cox proportional<br>hazards                                       | Age, LDH levels, SF, FAB<br>subgroup, number of<br>cytopenias, and karyotype (per<br>IPSS criteria) | Baseline                                                                                              | Continuous                                                                             | OS      | HR: 2.2<br>$p < 0.01$                                       |
|                                                               | Subgroup: Low<br>or Int-1<br>patients<br>293 | Multivariate<br>Cox proportional<br>hazards                                       | Age, LDH levels, SF, FAB<br>subgroup, number of<br>cytopenias, and karyotype (per<br>IPSS criteria) | Baseline                                                                                              | Continuous                                                                             | OS      | HR: 2.5<br>$p < 0.01$                                       |

| Study Author, Year<br>Country<br>Study Design              | Population (n)                             | Univariate or<br>Multivariate and<br>Type of Statistical<br>Analysis<br>Performed | Model Variables                                                                                     | Time Point at<br>Which SF<br>Evaluated | Continuous or<br>Categorical,<br>and Categories | Outcome | Effect                                                   |
|------------------------------------------------------------|--------------------------------------------|-----------------------------------------------------------------------------------|-----------------------------------------------------------------------------------------------------|----------------------------------------|-------------------------------------------------|---------|----------------------------------------------------------|
|                                                            | Subgroup: Int-2<br>or high patients<br>126 | Multivariate<br>Cox proportional<br>hazards                                       | Age, LDH levels, SF, FAB<br>subgroup, number of<br>cytopenias, and karyotype (per<br>IPSS criteria) | Baseline                               | Continuous                                      | OS      | HR: 1.8<br><br>$p = \text{NS}$                           |
| Wong, 2018 [35]<br><br>Canada<br><br>Retrospective cohort  | Overall<br><br>182                         | Multivariate<br>Cox proportional<br>hazards                                       | Age at MDS diagnosis, IPSS<br>score, SF, MDS diagnosis, ICT                                         | Baseline                               | Continuous                                      | OS      | HR (95%<br>CI): 1.0<br>(1–1); NR<br>SD: 0<br>$p = 0.7$   |
| Osanai, 2018 [27]<br><br>Japan<br><br>Retrospective cohort | Overall<br><br>98                          | Multivariate<br>Cox proportional<br>hazards                                       | NR                                                                                                  | Diagnosis<br>(baseline)                | Categorical<br>SF >500 ng/mL<br>(n = NR)        | OS      | HR (95%<br>CI): 3.04<br>(1.58–<br>5.70);<br>$p = 0.0012$ |

Abbreviations: ANC, absolute neutrophil count; BM, bone marrow; CI, confidence interval; CMML, chronic myelomonocytic leukemia; CRP, C-reactive protein; ECOG PS, Eastern Cooperative Oncology Group performance status; Hb, hemoglobin; HR, hazard ratio; HSCT, hematopoietic stem cell transplant; ICT, iron chelation therapy; IPSS, International Prognostic Scoring System; IPSS-R, revised International Prognostic Scoring System; LDH, lactate dehydrogenase; MDS, myelodysplastic syndromes; MK,

monosomal karyotype; NA, not applicable; NRM, non-relapse mortality; NR, not reported; NS, not significant; OS, overall survival; PLT, platelet; RBC, red blood cell; RR, relative risk; SF, serum ferritin; TRM, treatment-related mortality; WHO, World Health Organization.

**Table S5.** SF and PD and Relapse-Related Outcomes in MDS Studies.

| Study Author, Year<br>Country<br>Study Design                  | Population<br>( <i>n</i> ) | Univariate or<br>Multivariate and<br>Type of<br>Statistical<br>Analysis<br>Performed | Model Variables | Time point at<br>Which SF<br>Evaluated | Continuous or<br>Categorical,<br>and<br>Categories | Outcome                             | Effect          |
|----------------------------------------------------------------|----------------------------|--------------------------------------------------------------------------------------|-----------------|----------------------------------------|----------------------------------------------------|-------------------------------------|-----------------|
| Park, 2011 [28]<br>France<br>Retrospective cohort              | Overall<br>318             | Univariate<br>Wilcoxon's test                                                        | NR              | Diagnosis<br>(Baseline)                | Categorical<br>SF >300 ng/mL<br>( <i>n</i> = 153)  | Transformation<br>to AML            | <i>p</i> = 0.94 |
|                                                                | Overall<br>318             | Univariate<br>Wilcoxon's test                                                        | NR              | Diagnosis<br>(Baseline)                | Categorical<br>SF >1000<br>ng/mL ( <i>n</i> = 32)  | Transformation<br>to AML            | <i>p</i> = 0.47 |
| Waszczuk-Gajda,<br>2016 [34]<br>Poland<br>Retrospective cohort | Overall<br>190             | Univariate<br>Chi-squared test                                                       | NR              | Diagnosis<br>(Baseline)                | Categorical<br>SF >1000<br>ng/mL ( <i>n</i> = 20)  | Transformation<br>to AML            | <i>p</i> > 0.05 |
|                                                                | Overall<br>190             | Univariate<br>Chi-squared test                                                       | NR              | Diagnosis<br>(Baseline)                | Categorical<br>SF >1000<br>ng/mL ( <i>n</i> = 20)  | Time to<br>transformation<br>to AML | <i>p</i> = 0.35 |



| Study Author, Year<br>Country<br>Study Design                          | Population<br>( <i>n</i> ) | Univariate or<br>Multivariate and<br>Type of<br>Statistical<br>Analysis<br>Performed | Model Variables                                                                                                                                                                                                                                                                              | Time point at<br>Which SF<br>Evaluated | Continuous or<br>Categorical,<br>and<br>Categories | Outcome              | Effect                                               |
|------------------------------------------------------------------------|----------------------------|--------------------------------------------------------------------------------------|----------------------------------------------------------------------------------------------------------------------------------------------------------------------------------------------------------------------------------------------------------------------------------------------|----------------------------------------|----------------------------------------------------|----------------------|------------------------------------------------------|
| Cremers, 2019 [17]<br>European multi-<br>country<br>Prospective cohort | Overall<br>222             | Multivariate<br>Cox proportional<br>hazards                                          | One by one the other variables of<br>specific interest in the current study:<br>RBC transfusions, CRP levels, SF<br>levels (continuous in units of 1000<br>ng/mL) and comorbidities, WHO<br>classification, age at HSCT, donor<br>type, sex-match, and intensity of<br>conditioning regimen  | Baseline                               | Continuous<br>(units of 1000<br>ng/mL)             | Relapse<br>incidence | HR (95%<br>CI): 1.3<br>(1.01–<br>1.6);<br>$p = 0.04$ |
|                                                                        | Overall<br>222             | Multivariate<br>Cox proportional<br>hazards                                          | One by one the other variables of<br>specific interest in the current study:<br>RBC transfusions, CRP levels, SF<br>levels (continuous in units of 1000<br>ng/mL) and comorbidities, WHO-<br>classification, age at HSCT, donor<br>type, sex-match, and intensity of<br>conditioning regimen | Baseline                               | Continuous<br>(units of 1000<br>ng/mL)             | RFS                  | HR (95%<br>CI): 1.2<br>(0.98–<br>1.4);<br>$p = 0.08$ |

| Study Author, Year<br>Country<br>Study Design                    | Population<br>( <i>n</i> ) | Univariate or<br>Multivariate and<br>Type of<br>Statistical<br>Analysis<br>Performed | Model Variables | Time point at<br>Which SF<br>Evaluated                                  | Continuous or<br>Categorical,<br>and<br>Categories                        | Outcome              | Effect                      |
|------------------------------------------------------------------|----------------------------|--------------------------------------------------------------------------------------|-----------------|-------------------------------------------------------------------------|---------------------------------------------------------------------------|----------------------|-----------------------------|
| Kadlcikova, 2017<br>[21]<br>Czech Republic<br>Prospective cohort | Overall<br><br>73          | Multivariate<br><br>Cox proportional<br>hazards                                      | NR              | Diagnosis<br><br>(Baseline)                                             | Continuous                                                                | EFS                  | HR: 1.14<br><br>$p = 0.001$ |
| Oran, 2014 [26]<br>US<br>Retrospective cohort                    | Overall<br><br>256         | Univariate<br><br>Log rank test                                                      | NR              | All outcomes were<br>measured from the<br>time of stem cell<br>infusion | Categorical<br>SF >1130 µg/L<br>( <i>n</i> = NR)                          | Relapse<br>incidence | HR: 1.0<br><br>$p = 0.8$    |
|                                                                  | Overall<br><br>256         | Univariate<br><br>Log rank test                                                      | NR              | All outcomes were<br>measured from the<br>time of stem cell<br>infusion | Categorical<br>SF >1130 µg/L<br>( <i>n</i> = NR)                          | EFS                  | HR: 1.6<br><br>$p = 0.01$   |
|                                                                  | Overall<br><br>256         | Univariate<br><br>Log rank test                                                      | NR              | All outcomes were<br>measured from the<br>time of stem cell<br>infusion | Categorical<br>SF missing<br><i>versus</i> ≤1130<br>µg/L ( <i>n</i> = NR) | Relapse<br>incidence | HR: 1.7<br><br>$p = 0.06$   |

| Study Author, Year<br>Country<br>Study Design     | Population<br>(n) | Univariate or<br>Multivariate and<br>Type of<br>Statistical<br>Analysis<br>Performed | Model Variables                                                                                         | Time point at<br>Which SF<br>Evaluated                                       | Continuous or<br>Categorical,<br>and<br>Categories                    | Outcome | Effect                                      |
|---------------------------------------------------|-------------------|--------------------------------------------------------------------------------------|---------------------------------------------------------------------------------------------------------|------------------------------------------------------------------------------|-----------------------------------------------------------------------|---------|---------------------------------------------|
|                                                   | Overall<br>256    | Univariate<br><br>Log rank test                                                      | NR                                                                                                      | All outcomes were<br><br>measured from the<br>time of stem cell<br>infusion  | Categorical<br><br>SF missing<br><i>versus</i> ≤1130<br>µg/L (n = NR) | EFS     | HR: 1.5<br><br><i>p</i> = 0.05              |
|                                                   | Overall<br>256    | Multivariate<br><br>Cox proportional<br>hazards or Fine<br>and Gray method           | Age, histological subtype, T-MDS,<br>MK, SF levels, BM blast count at<br>HSCT, and transplantation year | All outcomes were<br><br>measured from the<br>time of stem cell<br>infusion  | Categorical<br><br>SF >1150 µg/L<br>(n = NR)                          | EFS     | HR: 1.8<br><br><i>p</i> = 0.002             |
|                                                   | Overall<br>256    | Multivariate<br><br>Cox proportional<br>hazards or Fine<br>and Gray method           | Age, histological subtype, T-MDS,<br>MK, SF, BM blast count at HSCT<br>and transplantation year         | All outcomes were<br><br>measured from the<br>time of stem cell<br>infusion  | Categorical<br><br>SF missing<br><i>versus</i> ≤1150<br>µg/L (n = NR) | EFS     | HR: 1.0<br><br><i>p</i> = 0.9               |
| Prem, 2020 [30]<br>Canada<br>Retrospective cohort | Overall<br>125    | Univariate<br><br>Log rank test                                                      | NR                                                                                                      | Pretransplant<br>ferritin levels were<br>assessed within 30<br>days prior to | Categorical<br><br>SF ≤1000<br><i>versus</i> >1000<br>ng/mL           | RFS     | HR (95%<br>CI): 1.931<br>(1.239–<br>30.10); |

| Study Author, Year<br>Country<br>Study Design       | Population<br>( <i>n</i> )                                            | Univariate or<br>Multivariate and<br>Type of<br>Statistical<br>Analysis<br>Performed | Model Variables | Time point at<br>Which SF<br>Evaluated                                                                | Continuous or<br>Categorical,<br>and<br>Categories              | Outcome | Effect                                                         |
|-----------------------------------------------------|-----------------------------------------------------------------------|--------------------------------------------------------------------------------------|-----------------|-------------------------------------------------------------------------------------------------------|-----------------------------------------------------------------|---------|----------------------------------------------------------------|
|                                                     |                                                                       |                                                                                      |                 | admission for<br>transplant                                                                           |                                                                 |         | $p =$<br>0.0037                                                |
|                                                     | Overall<br>125                                                        | Multivariate<br>Cox proportional<br>hazards                                          | NR              | Pretransplant SF<br>levels were<br>assessed within 30<br>days prior to<br>admission for<br>transplant | Categorical<br>SF $\leq 1000$<br><i>versus</i> $>1000$<br>ng/mL | RFS     | HR (95%<br>CI): 1.799<br>(1.147–<br>2.823);<br>$p =$<br>0.0106 |
| Kikuchi, 2012 [23]<br>Japan<br>Retrospective cohort | Overall:<br>47<br><br>Low SF<br>group: 37<br><br>High SF<br>group: 10 | Univariate<br>Logistic regression                                                    | NR              | Diagnosis<br>(Baseline)                                                                               | Categorical<br>SF $\geq 500$ ng/mL<br>( $n = 10$ )              | LFS     | HR (95%<br>CI): 21.16<br>(2.062–<br>217.1);<br>$p = 0.01$      |
|                                                     | Overall:                                                              | Univariate<br>Logistic regression                                                    | NR              | Diagnosis<br>(Baseline)                                                                               | Categorical                                                     | LFS     | HR (95%<br>CI): 4.752                                          |

| Study Author, Year<br>Country<br>Study Design               | Population<br>( <i>n</i> )                                | Univariate or<br>Multivariate and<br>Type of<br>Statistical<br>Analysis<br>Performed | Model Variables                                                                                         | Time point at<br>Which SF<br>Evaluated | Continuous or<br>Categorical,<br>and<br>Categories | Outcome | Effect                                     |
|-------------------------------------------------------------|-----------------------------------------------------------|--------------------------------------------------------------------------------------|---------------------------------------------------------------------------------------------------------|----------------------------------------|----------------------------------------------------|---------|--------------------------------------------|
|                                                             | 47<br><br>Low SF<br>group: 37<br><br>High SF<br>group: 10 |                                                                                      |                                                                                                         |                                        | SF $\geq 300$ ng/mL<br><br>( <i>n</i> = NR)        |         | (0.852–<br>26.51);<br><br><i>p</i> = 0.076 |
| Sperr, 2010 [33]<br><br>Austria<br><br>Retrospective cohort | Overall:<br><br>419                                       | Multivariate<br><br>Cox proportional<br>hazards                                      | Age, LDH levels, SF levels, FAB<br>subgroup, number of cytopenias, and<br>karyotype (per IPSS criteria) | Baseline                               | Continuous                                         | EFS     | HR: 2.0<br><br><i>p</i> < 0.01             |
|                                                             | Subgroup:<br><br>Low or Int-1<br>patients<br><br>293      | Multivariate<br><br>Cox proportional<br>hazards                                      | Age, LDH levels, SF levels, FAB<br>subgroup, number of cytopenias, and<br>karyotype (per IPSS criteria) | Baseline                               | Continuous                                         | EFS     | HR: 2.9<br><br><i>p</i> < 0.01             |
|                                                             | Subgroup:<br><br>Int-2 or High<br>patients<br><br>126     | Multivariate<br><br>Cox proportional<br>hazards                                      | Age, LDH levels, SF levels, FAB<br>subgroup, number of cytopenias, and<br>karyotype (per IPSS criteria) | Baseline                               | Continuous                                         | EFS     | HR: 1.2<br><br><i>p</i> = NS               |

Abbreviations: AML, acute myeloid leukemia; BM, bone marrow; CI, confidence interval; CRP, C-reactive protein; EFS, event-free survival; FAB, French–American–British; HR, hazard ratio; HSCT, hematopoietic stem cell transplant; IPSS, International Prognostic Scoring System; LDH, lactate dehydrogenase; LFS, leukemia-free survival; MDS, myelodysplastic syndromes; MK, monosomal karyotype; NR, not reported; NS, not significant; RBC, red blood cell; RFS, relapse-free survival; SF, serum ferritin; T-MDS, treatment-related myelodysplastic syndromes; WHO, World Health Organization.

**Table S6.** Serum Ferritin and Other Outcomes in MDS Studies.

| Study Author, Year<br>Country<br>Study Design           | Population<br>( <i>n</i> ) | Univariate or<br>Multivariate and<br>Type of<br>Statistical<br>Analysis<br>Performed | Model<br>Variables | When SF Evaluated                                                                                                                                                                                                                                                                                                                                                                                                | Continuous or<br>Categorical,<br>and<br>Categories | Outcome                                 | Effect                            |
|---------------------------------------------------------|----------------------------|--------------------------------------------------------------------------------------|--------------------|------------------------------------------------------------------------------------------------------------------------------------------------------------------------------------------------------------------------------------------------------------------------------------------------------------------------------------------------------------------------------------------------------------------|----------------------------------------------------|-----------------------------------------|-----------------------------------|
| Irwin, 2011 [20]<br>New Zealand<br>Retrospective cohort | Overall<br>70              | Univariate<br>Pearson product-<br>moment<br>correlation<br>coefficient               | NR                 | The SF level at diagnosis and the most recently performed SF level were recorded. As this was a retrospective analysis, the most recent SF of each patient was not always taken at the end of the study. For some patients, the most recent SF was performed after the bulk of their transfusions, while for others it was performed before a significant proportion of their transfusions had been administered | Continuous                                         | Number of<br>units of RBC<br>transfused | Model<br>coefficient: $r = 0.290$ |

| Study Author, Year<br>Country<br>Study Design                     | Population<br>( <i>n</i> ) | Univariate or<br>Multivariate and<br>Type of<br>Statistical<br>Analysis<br>Performed                  | Model<br>Variables | When SF Evaluated                                                                                                                    | Continuous or<br>Categorical,<br>and<br>Categories | Outcome                                  | Effect                                            |
|-------------------------------------------------------------------|----------------------------|-------------------------------------------------------------------------------------------------------|--------------------|--------------------------------------------------------------------------------------------------------------------------------------|----------------------------------------------------|------------------------------------------|---------------------------------------------------|
| Cakar, 2013 [15]<br>Turkey<br>Retrospective cohort                | Overall<br>35              | Univariate<br>Mann–Whitney U<br>test                                                                  | NR                 | Diagnosis (Baseline)                                                                                                                 | Continuous                                         | Treatment<br>response                    | $p = 0.004$                                       |
| Escudero-Vilaplana,<br>2015 [19]<br>Spain<br>Retrospective cohort | Overall<br>35              | Multivariate<br>Pearson product-<br>moment<br>correlation<br>coefficient or<br>Spearman's rho<br>test | NR                 | During treatment                                                                                                                     | Continuous                                         | Medication<br>adherence                  | Model<br>coefficient: $r = -0.288$<br>$p = 0.004$ |
| Lucijanic, 2016 [25]<br>Croatia<br>Prospective cohort             | Overall<br>36              | Univariate<br>Fisher exact test or<br>Chi-squared test                                                | NR                 | Parameters of iron metabolism were measured<br>repeatedly during the follow-up period and the<br>most recent follow-up data was used | Categorical<br>SF >1000 µg/L                       | Blood units<br>received                  | Spearman<br>Rho: 0.52<br>$p = 0.04$               |
| Risum, 2016 [31]<br>Denmark<br>Prospective cohort                 | Overall<br>60              | Univariate<br>Spearman's test                                                                         | NR                 | Most patients had their SF measured within 1<br>day of the FibroScan, but some outpatients had                                       | Categorical<br>High <i>versus</i><br>low SF*       | Median liver<br>stiffness<br>measurement | $p = 0.583$                                       |

| <b>Study Author, Year<br/>Country<br/>Study Design</b> | <b>Population<br/>(n)</b> | <b>Univariate or<br/>Multivariate and<br/>Type of<br/>Statistical<br/>Analysis<br/>Performed</b> | <b>Model<br/>Variables</b> | <b>When SF Evaluated</b>                                                    | <b>Continuous or<br/>Categorical,<br/>and<br/>Categories</b> | <b>Outcome</b> | <b>Effect</b> |
|--------------------------------------------------------|---------------------------|--------------------------------------------------------------------------------------------------|----------------------------|-----------------------------------------------------------------------------|--------------------------------------------------------------|----------------|---------------|
|                                                        |                           |                                                                                                  |                            | their SF measured up to 19 days before or after<br>the day of the FibroScan |                                                              |                |               |

\*High SF was >320 µg/L in men and >161 µg/L in women.

Abbreviations: NR, not reported; RBC, red blood cell; SF, serum ferritin.
